# Supplementary material for: Monitoring the durability of the long-lasting insecticidal nets Olyset® and PermaNet® 2.0 in similar use environments in Zanzibar
Source: Springer Nature journal article supplement (doi:10.1186/s12936-020-03258-w), 2020-05-24
Supplement: MOESM1 [file 18009212]

### Additional file 1

Table: Household characteristics (based on households that were seen at baseline and endline surveys, N=243)

| Variable                               | Unguja            | Pemba            | P-value<br>for comparison<br>between sites |
|----------------------------------------|-------------------|------------------|--------------------------------------------|
|                                        | % (95% CI)*       | % (95% CI)*      |                                            |
| <b>Demographic</b>                     |                   |                  |                                            |
| Mean number of de-jure members         | 5.4 (5.1-5.8)     | 6.1 (5.5-6.7)    | 0.053                                      |
| Mean age of head of household in years | 47.7 (45.0-50.4)  | 47.6 (43.8-51.3) | 0.96                                       |
| Proportion of female headed households | 24.3 (17.8-32.4)  | 11.4 ( 6.5-19.4) | 0.016                                      |
| Proportion of under-fives              | 14.8 (12.8-17.1)  | 17.7 (14.8-20.9) | 0.13                                       |
| Education of male heads of household   |                   |                  |                                            |
| Non-literate                           | 26.1 (19.0-34.5)  | 28.2 (19.6-38.8) | 0.60                                       |
| Primary                                | 33.2 (24.3-43.5)  | 27.0 (20.7-34.4) |                                            |
| Secondary                              | 40.8 (31.6-50.9)  | 44.8 (33.9-56.2) |                                            |
| <b>House characteristics</b>           |                   |                  |                                            |
| Improved roof materials                | 0.4 (0.1-3.1)     | 4.0 (0.5-26.7)   | 0.06                                       |
| Improved wall materials                | 78.2 (62.1-88.6)  | 64.9 (46.9-79.6) | 0.22                                       |
| Improved floor materials               | 72.2 (58.9-82.4)  | 72.1 (56.4-83.8) | 0.99                                       |
| Cooking fuel kerosene or gas           | 0.8 ( 0.2- 3.2)   | 0.8 ( 0.2- 3.3)  | 0.96                                       |
| <b>Water and sanitation</b>            |                   |                  |                                            |
| Access to safe water                   | 84.5 (77.0-89.8)  | 89.9 (75.6-96.3) | 0.39                                       |
| Access to any latrine                  | 93.4 (86.7-97.1)  | 82.7 (66.0-92.1) | 0.06                                       |
| Improved latrine or flush toilet       | 30.7 (18.1-47.09) | 47.2 (31.1-63.9) | 0.15                                       |
| <b>Household assets</b>                |                   |                  |                                            |
| Any transport                          | 61.8 (52.7-70.0)  | 66.9 (55.6-76.6) | 0.45                                       |
| Type of transport                      |                   |                  |                                            |
| Bicycle                                | 57.1 (47.4-66.3)  | 60.9 (49.8-71.0) | 0.60                                       |
| Motorcycle                             | 10.1 ( 6.0-16.6)  | 14.1 ( 9.6-20.4) | 0.29                                       |
| Car                                    | 3.4 ( 1.6- 7.1)   | 4.4 ( 2.0- 9.4)  | 0.60                                       |
| Owns farm land                         | 64.3 (49.5-76.8)  | 60.9 (49.6-71.2) | 0.70                                       |
| Owns livestock                         | 64.7 (54.1-74.1)  | 71.8 (61.6-80.1) | 0.30                                       |
| Type of livestock                      |                   |                  |                                            |
| Chicken                                | 58.6 (46.5-69.7)  | 61.3 (49.5-71.8) | 0.74                                       |
| Duck or turkey                         | 9.3 ( 6.5-13.2)   | 8.5 ( 4.4-15.8)  | 0.81                                       |
| Goats                                  | 6.8 ( 3.2-13.7)   | 3.3 ( 1.1- 9.5)  | 0.26                                       |
| Cows                                   | 11.0 ( 5.8-19.9)  | 13.6 ( 7.2-24.3) | 0.62                                       |
| Household items owned                  |                   |                  |                                            |
| Radio                                  | 64.7 (59.6-69.5)  | 44.4 (36.6-52.4) | 0.0001                                     |
| Television                             | 18.9 (11.8-28.9)  | 35.5 (23.2-50.0) | 0.038                                      |
| Refrigerator                           | 14.7 ( 8.4-24.4)  | 26.2 (16.9-38.3) | 0.085                                      |
| Fan                                    | 12.6 ( 6.7-22.4)  | 22.2 (13.3-34.7) | 0.14                                       |
| Iron                                   | 13.5 ( 6.9-24.7)  | 27.4 (16.8-41.4) | 0.067                                      |
| Any mobile phone                       | 89.1 (82.3-93.5)  | 84.7 (75.8-90.7) | 0.32                                       |
| Smartphone or computer                 | 13.5 ( 9.3-20.2)  | 24.2 (15.9-35.0) | 0.050                                      |

\*Unless otherwise indicated in column 1
